# Supplementary material
Source: PubMed Central journal article supplement (PMC7732019)
Supplement: NIHMS1651082-supplement-Supplement.pdf [file NIHMS1651082-supplement-Supplement.pdf]

**SUPPLEMENT TABLE 1:** Center for Epidemiologic Studies-Depression (CES-D) scores, by categories of selected participant characteristics from the Cerebrovascular Disease and its Consequences in American Indians study (2010-2013)

| Characteristic               | Category              | CES-D<16    | CES-D 16+   |
|------------------------------|-----------------------|-------------|-------------|
|                              |                       | N=544       | N=138       |
| Age (years)                  |                       | 73.2 (6.0)  | 73.3 (6.1)  |
| Female sex                   |                       | 352 (64.7%) | 102 (73.9%) |
| Education                    | Up to/any high school | 99 (18.2%)  | 37 (26.8%)  |
|                              | Graduated high school | 132 (24.3%) | 43 (31.2%)  |
|                              | Any college           | 225 (41.4%) | 43 (31.2%)  |
|                              | Graduated college     | 88 (16.2%)  | 15 (10.9%)  |
| Annual household income      | <\$10,000             | 164 (30.1%) | 56 (40.6%)  |
|                              | \$10-20,000           | 158 (20.0%) | 45 (32.6%)  |
|                              | \$20-35,000           | 122 (22.4%) | 22 (15.9%)  |
|                              | >\$35,000             | 100 (18.4%) | 15 (10.9%)  |
| Study field site             | Northern plains       | 223 (41.0%) | 72 (52.2%)  |
|                              | Southern plains       | 257 (47.2%) | 55 (39.9%)  |
|                              | Southwest             | 64 (11.8%)  | 11 (8.0%)   |
| Marital status               | Single                | 24 (4.4%)   | 9 (6.5%)    |
|                              | Married or Partnered  | 216 (39.7%) | 43 (31.2%)  |
|                              | Previously Married    | 304 (55.9%) | 86 (62.3%)  |
| BMI categories               | Normal                | 87 (16.0%)  | 16 (11.6%)  |
|                              | Overweight            | 164 (30.1%) | 42 (30.4%)  |
|                              | Obese                 | 293 (53.9%) | 80 (58.0%)  |
| Alcohol use within last year |                       | 98 (18.0%)  | 15 (10.9%)  |
| Ever smoker                  |                       | 367 (67.5%) | 86 (62.3%)  |
| Hypertension                 |                       | 440 (80.9%) | 118 (85.5%) |
| Diabetes                     |                       | 271 (49.8%) | 80 (58.0%)  |
| High LDL (>100 mg/dL)        |                       | 255 (46.9%) | 53 (38.4%)  |

## SUPPLEMENTAL FIGURE

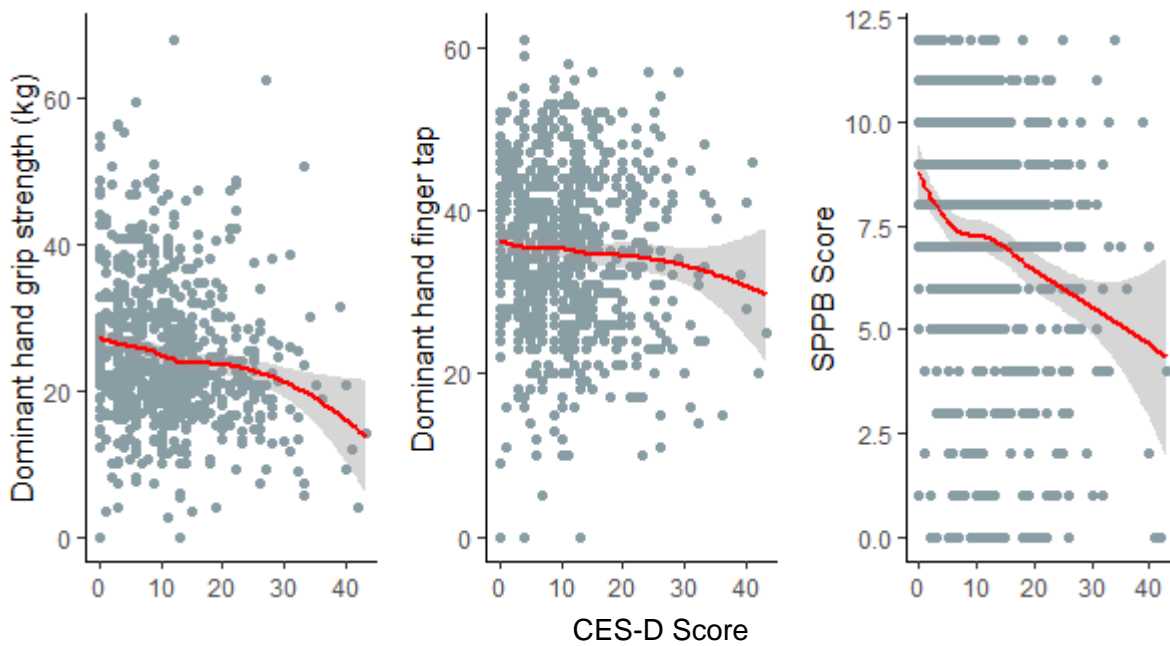

### FIGURE LEGEND

Scatterplots with loess fit (red curve) and 95% confidence interval (grey shading) showing association of physical function examination scores (Y-axes) with Centers for Epidemiologic Studies-Depression (CES-D) scores (X-axes) in older American Indians (2010-2013). Physical examinations include grip strength (kg) for dominant hand, Halstead finger tap for dominant hand, and Short Physical Performance Battery (SPPB).

**SUPPLEMENT TABLE 2:** Generalized linear model findings for associations between Centers for Epidemiologic Studies-Depression (CES-D) scores with cognitive and physical function tests in older American Indians (2010-2013)

|                 | $\beta$ | 95% CI       | <i>P</i> -value |
|-----------------|---------|--------------|-----------------|
| 3MSE            | -0.10   | -0.17, -0.03 | 0.008           |
| COWA            | -0.10   | -0.19, -0.01 | 0.035           |
| WAIS coding     | -0.13   | -0.25, -0.03 | 0.017           |
| CVLT long free* | -0.01   | -0.06, +0.03 | 0.497           |
| Grip strength   | -0.04   | -0.10, +0.01 | 0.151           |
| Finger tap      | -0.01   | -0.08, +0.07 | 0.776           |
| SPPB            | -0.05   | -0.07, -0.03 | <0.001          |

\*CVLT model used Poisson distribution to model errors in generalized linear model; all other models used Gaussian.

Model 3: Adjustment features included field site, age, sex, education, annual household income, marital status, alcohol use, smoking status, diabetes, hypertension, obesity, LDL, prior stroke, infarct, and hemorrhage.
